# Supplementary material for: 3,5-Dinitro-1-(3,3,3-trifluoropropyl)-1H-pyrazol-4-amine as an insensitive and thermostable energetic melt-castable material
Source: Royal Society of Chemistry journal article supplement (doi:10.1039/d4ce01036a), 2024-11-18
Supplement: d4ce01036a1.pdf [file d4ce01036a1.pdf]

Electronic Supplementary Information

**3,5-Dinitro-1-(3,3,3-trifluoropropyl)-1*H*-pyrazol-4-amine as  
insensitive and thermostable energetic melt-castable material**

Dangyue Yin, Boqian Yang, Hongyu Lv, Siwei Song, Yi Wang\* and  
Qinghua Zhang\*

School of Astronautics, Northwestern Polytechnical University, Shanxi  
Xi'an, 710065, China.

## Table of contents

|                                                    |   |
|----------------------------------------------------|---|
| 1. Experimental Section.....                       | 1 |
| 2. X-ray Crystallography .....                     | 2 |
| 3. Calculation Methods.....                        | 3 |
| 4. Reference .....                                 | 6 |
| 5. NMR, Mass and IR Spectra of <b>TFDNPA</b> ..... | 7 |

## 1. Experimental Section

**Caution!** Although we have encountered no difficulties in preparing these nitrogen-rich compounds in this work, manipulations must be carried out by using appropriate standard safety precautions. Eye protection and leather gloves must be worn. Mechanical actions of these energetic materials involving scratching or scraping must be avoided!

**General.** All reagents (analytical grade) were purchased from Macklin or Aladdin and were used as supplied, 3,5-dinitro-1*H*-pyrazol-4-amine (**1**) was synthesized according to the reported literature.<sup>[1]</sup> <sup>1</sup>H and <sup>13</sup>C NMR spectra were recorded on Bruker 600 MHz nuclear magnetic resonance spectrometers. Chemical shifts for <sup>1</sup>H and <sup>13</sup>C NMR spectra are reported relative to Me<sub>4</sub>Si or deuterated solvents. Melting and decomposition points were recorded on a differential scanning calorimeter (DSC, TA Discovery 25) at the scan rates of 5~20 °C·min<sup>-1</sup>. Impact and friction sensitivity measurements were made using standard BAM fall hammer and BAM friction tester. Densities were determined at room temperature by employing a Micromeritics AccuPyc II 1340 gas pycnometer.

**Synthesis of TFDNPA:** The 3,5-dinitro-1*H*-pyrazol-4-amine (1.00 g, 5.8mmol) was dissolved in N,N-Dimethylformamide and a aqueous solution (2mL) of potassium hydroxide (0.65 g, 11.6 mmol) was slowly

added to give the homogeneous solution. Then, the 1,1,1-trifluoro-2-iodoethane (1.50 g, 7.1 mmol) was added and the solution was heated to 90 °C for 24 hours. The solution was cooled down and filtered out, a pale yellow solid was obtained after drying (isolated yield: 94.3%). <sup>1</sup>H NMR (600 MHz, CDCl<sub>3</sub>) δ 6.43 (s), 4.93 (t), 2.80-2.81 (m). <sup>13</sup>C NMR (151 MHz, CDCl<sub>3</sub>) δ 140.89, 131.66, 129.98, 126.03, 77.37, 77.16, 76.95, 48.50, 33.98. IR (KBr, cm<sup>-1</sup>): 3498.87, 3387.00, 1656.85, 1481.33, 1303.87, 1136.07, 1033.84, 825.53, 773.46, 663.51, 553.57. ESI-HRMS: m/z calcd for [TFDNPA]<sup>-</sup>: 268.0299, found: 268.0298. Elemental analysis calcd (%) for C<sub>6</sub>H<sub>6</sub>F<sub>3</sub>N<sub>5</sub>O<sub>4</sub> (269.14): C 26.78, H 2.25, N 26.02; found: C 27.08, H 2.53, N 25.65.

## 2. X-ray Crystallography

Table S1 Crystal data and structural refinement parameters of **TFDNPA**

| Parameter         | <b>TFDNPA</b>                                                              |
|-------------------|----------------------------------------------------------------------------|
| CCDC number       | 2402298                                                                    |
| Empirical formula | C <sub>6</sub> H <sub>6</sub> F <sub>3</sub> N <sub>5</sub> O <sub>4</sub> |
| Formula weight    | 269.16                                                                     |
| Temperature/K     | 293                                                                        |
| Crystal system    | orthorhombic                                                               |
| Space group       | Pca2 <sub>1</sub>                                                          |
| a/Å               | 11.6467(3)                                                                 |
| b/Å               | 5.65600(10)                                                                |
| c/Å               | 31.9545(12)                                                                |

|                                               |                                                            |
|-----------------------------------------------|------------------------------------------------------------|
| $\alpha/^\circ$                               | 90                                                         |
| $\beta/^\circ$                                | 90                                                         |
| $\gamma/^\circ$                               | 90                                                         |
| Volume/ $\text{\AA}^3$                        | 2104.96(10)                                                |
| Z                                             | 8                                                          |
| $\rho_{\text{calc}}/\text{cm}^3$              | 1.699                                                      |
| $\mu/\text{mm}^{-1}$                          | 1.565                                                      |
| F(000)                                        | 1088                                                       |
| Crystal size/ $\text{mm}^3$                   | $0.02 \times 0.02 \times 0.02$                             |
| Radiation                                     | CuK $\alpha$ ( $\lambda = 1.54178$ )                       |
| $2\Theta$ range for data collection/ $^\circ$ | 11.076 to 155.006                                          |
| Index ranges                                  | $-13 \leq h \leq 14, -7 \leq k \leq 5, -40 \leq l \leq 38$ |
| Reflections collected                         | 8708                                                       |
| Independent reflections                       | 3559 [Rint = 0.0507, Rsigma = 0.0680]                      |
| Data/restraints/parameters                    | 3559/1/325                                                 |
| Goodness-of-fit on $F^2$                      | 1.056                                                      |
| Final R indexes [ $I \geq 2\sigma(I)$ ]       | R1 = 0.0664, wR2 = 0.1828                                  |
| Final R indexes [all data]                    | R1 = 0.0785, wR2 = 0.1933                                  |
| Largest diff. peak/hole / $e \text{\AA}^{-3}$ | 0.35/-0.26                                                 |
| Flack parameter                               | 0.5(3)                                                     |

---

Table S2 Bond Length (Å) of **TFDNPA**

| Atom | Atom | Length/Å  | Atom | Atom | Length/Å  |
|------|------|-----------|------|------|-----------|
| N001 | N00D | 1.321(7)  | N00D | C00Q | 1.346(9)  |
| N001 | C00U | 1.460(10) | F00H | C4   | 1.303(14) |
| N001 | C00W | 1.380(9)  | N00I | C00W | 1.401(9)  |
| O002 | N00A | 1.218(10) | C00K | C00N | 1.397(9)  |
| N003 | N009 | 1.313(7)  | N00L | C00O | 1.345(10) |
| N003 | C00K | 1.372(9)  | N00M | C00N | 1.317(10) |
| N003 | C00X | 1.469(10) | C00N | C00P | 1.409(9)  |
| N005 | O008 | 1.239(9)  | C00O | C00Q | 1.414(9)  |
| N005 | O00G | 1.240(9)  | C00O | C00W | 1.390(9)  |
| N005 | C00K | 1.397(8)  | C00U | C00V | 1.483(13) |
| O006 | N00I | 1.222(9)  | C00V | C4   | 1.502(14) |
| O007 | N00I | 1.212(9)  | C00X | C00Y | 1.546(13) |
| N009 | C00P | 1.323(9)  | C00Y | C0AA | 1.445(19) |
| N00A | O00F | 1.222(10) | C4   | F0AA | 1.306(18) |
| N00A | C00Q | 1.409(9)  | C4   | F2   | 1.257(18) |
| O00B | N00C | 1.227(10) | C0AA | F1   | 1.332(16) |
| N00C | O00J | 1.228(11) | C0AA | F1AA | 1.364(18) |
| N00C | C00P | 1.422(8)  | C0AA | F4   | 1.304(17) |

Table S3 Bond Angles for **TFDNPA**

| Atom | Atom | Atom | Angle/°  | Atom | Atom | Atom | Angle/°  |
|------|------|------|----------|------|------|------|----------|
| N00D | N001 | C00U | 118.3(5) | N00L | C00O | C00W | 129.0(6) |
| N00D | N001 | C00W | 111.5(5) | C00W | C00O | C00Q | 102.4(6) |
| C00W | N001 | C00U | 129.9(5) | N009 | C00P | N00C | 119.5(6) |
| N009 | N003 | C00K | 110.4(5) | N009 | C00P | C00N | 113.9(5) |

|      |      |      |          |      |      |      |           |
|------|------|------|----------|------|------|------|-----------|
| N009 | N003 | C00X | 118.6(6) | C00N | C00P | N00C | 126.6(6)  |
| C00K | N003 | C00X | 130.7(5) | N00A | C00Q | C00O | 126.9(6)  |
| O008 | N005 | O00G | 122.8(6) | N00D | C00Q | N00A | 120.5(6)  |
| O008 | N005 | C00K | 120.2(6) | N00D | C00Q | C00O | 112.6(5)  |
| O00G | N005 | C00K | 116.9(7) | N001 | C00U | C00V | 114.9(6)  |
| N003 | N009 | C00P | 106.0(5) | C00U | C00V | C4   | 115.8(9)  |
| O002 | N00A | O00F | 123.8(8) | N001 | C00W | N00I | 124.7(6)  |
| O002 | N00A | C00Q | 117.0(7) | N001 | C00W | C00O | 108.0(6)  |
| O00F | N00A | C00Q | 119.0(7) | C00O | C00W | N00I | 127.3(7)  |
| O00B | N00C | O00J | 124.6(7) | N003 | C00X | C00Y | 111.5(7)  |
| O00B | N00C | C00P | 119.3(7) | C0AA | C00Y | C00X | 115.7(9)  |
| O00J | N00C | C00P | 116.1(7) | F00H | C4   | C00V | 114.6(9)  |
| N001 | N00D | C00Q | 105.5(5) | F00H | C4   | F0AA | 103.7(13) |
| O006 | N00I | C00W | 119.8(6) | F0AA | C4   | C00V | 111.3(10) |
| O007 | N00I | O006 | 124.3(6) | F2   | C4   | F00H | 109.4(11) |
| O007 | N00I | C00W | 115.9(7) | F2   | C4   | C00V | 112.1(13) |
| N003 | C00K | N005 | 125.0(6) | F2   | C4   | F0AA | 104.8(14) |
| N003 | C00K | C00N | 109.2(5) | F1   | C0AA | C00Y | 112.7(15) |
| C00N | C00K | N005 | 125.8(6) | F1   | C0AA | F1AA | 101.2(11) |
| C00K | C00N | C00P | 100.5(6) | F1AA | C0AA | C00Y | 113.9(10) |
| N00M | C00N | C00K | 130.1(6) | F4   | C0AA | C00Y | 114.7(12) |
| N00M | C00N | C00P | 129.5(6) | F4   | C0AA | F1   | 104.5(10) |
| N00L | C00O | C00Q | 128.6(6) | F4   | C0AA | F1AA | 108.7(17) |

Table S4 Hydrogen Atom Coordinates ( $\text{\AA} \times 10^4$ ) and Isotropic Displacement

Parameters ( $\text{\AA}^2 \times 10^3$ ) for **TFDNPA**

| Atom | x | y | z | U(eq) |
|------|---|---|---|-------|
|------|---|---|---|-------|

|      |         |          |         |    |
|------|---------|----------|---------|----|
| H00A | 4549.35 | 4999.13  | 7377.51 | 81 |
| H00B | 5323.01 | 2902.49  | 7385.39 | 81 |
| H00G | 7108.74 | 10012.69 | 2624.83 | 83 |
| H00H | 7870.69 | 7898.36  | 2614.01 | 83 |
| H00C | 2034.1  | 3755.62  | 5975.09 | 69 |
| H00D | 2757.3  | 1870.61  | 5732.19 | 69 |
| H00E | 3406.17 | 6601.51  | 5796.47 | 88 |
| H00F | 2723.61 | 5598.97  | 5414.28 | 88 |
| H00I | 5340.52 | 6859.04  | 4275.26 | 80 |
| H00J | 4590.68 | 8714.9   | 4033.27 | 80 |
| H00K | 6074.31 | 11618.23 | 4182.96 | 96 |
| H00L | 5351.34 | 10837.42 | 4571.52 | 96 |

### 3. Calculation Methods

#### 3.1 Computational methods for heats of formation

The enthalpy ( $H$ ) for compound at standard condition (298K, 1atm) were directly calculated by G4(MP2)-6x method with Gaussian 09 (Revision D.01) suite of program. G4(MP2)-6x method is a composite procedure with a lower cost but performance approaching that of G4.<sup>[2]</sup> In this method, geometries were optimized with the BMK functional using the 6-31+G(2df,p) basis set. Zero-point vibrational energies (ZPVEs) and thermal corrections to enthalpy ( $\Delta H$ ) at 298K, derived from scaled BMK/6-31+G(2df,p) frequencies, were incorporated into the total energies. Single-point energies were obtained at the HF/GFHFB3, HF/GFHFB4,



MP2(FrzG4)/GTMP2LargeXP, and CCSD(T,FrzG4)/GTBas1 levels with composite procedures.

After acquiring the enthalpy of compounds, their gas phase enthalpy of formation can be calculated by atomization method as following equation

(1):

$$\begin{aligned} \Delta H_f(g) &= H(C_l H_m O_n N_i(g)) - lH(C(g)) - \frac{m}{2}H(H_2(g)) - \frac{n}{2}H(O_2(g)) - \frac{i}{2} \\ &H(N_2(g)) + lH_{vap}(graphite) \end{aligned}$$

(1)

For neutral compounds with calculated gas state heat of formation, the solid state heat of formation was calculated by the following equation (2).

The heat of sublimation  $\Delta H_{SUB}$  was estimated by the following equation (3). T is the melting point or decomposition point temperature in Kelvin.

$$\Delta H_f(s) = \Delta H_f(g) - \Delta H_{SUB} \quad (2)$$

$$\Delta H_{SUB}(g) = 0.188 * T \quad (3)$$

### 3.2 Computational methods for Ab initio molecular dynamics (AIMD)

The computational simulations were carried out using the CP2K (version 9.1) program package.<sup>[3]</sup> The initial structures of the systems were constructed using Materials Studio (version 8.0). The structures were then optimized using CP2K to ensure that they were in their minimum energy configurations before further ab initio molecular dynamics (Sees Figure

S1). The Perdew-Burke-Ernzerhof (PBE) functional within the Generalized Gradient Approximation (GGA) was employed to describe the exchange-correlation interactions.<sup>[4]</sup> A double-zeta valence plus polarization (DZVP-MOLOPT-SR-GTH) basis set was used for all atoms. Goedecker-Teter-Hutter (GTH) pseudopotentials were employed to represent the core electrons. A plane-wave cutoff energy of 400 Ry was chosen for the auxiliary plane wave basis set. The relative cutoff for the Gaussian basis set was set to 55 Ry. Geometry optimizations were performed until the forces on all atoms were less than  $4.5E^{-4}$  hartree/bohr and the maximum displacement allowed for each optimization step was set to  $3E^{-3}$  bohr. For ab initio molecular dynamics, NVT (constant number of particles, volume, and temperature) ensemble was used. The CSVN thermostat was applied to maintain the temperature at 4000 K with a time constant of 200 fs. A time step of 0.5 fs was used for integrating the equations of motion. Each simulation was run for a total duration of 5 ps (10000 steps in total).

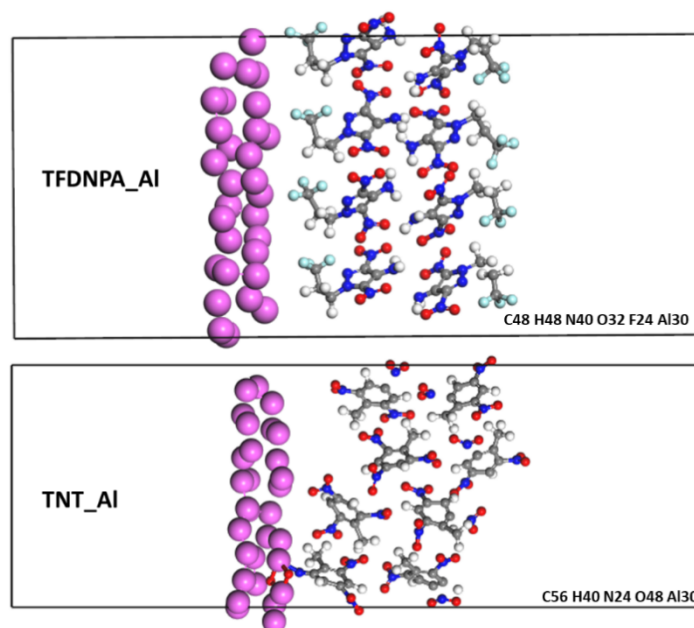

Figure S1. Structures after geometry optimization

#### 4. Reference

- [1] Y. Zhang, Y. Huang, D. A. Parrish and J. M. Shreeve, *J. Mater. Chem.*, 2011, **21**, 6891.
- [2] B. Chan, J. Deng and L. Radom, *J. Chem. Theory Comput.*, 2011, **7**, 112-120.
- [3] T. D. Kühn, M. Iannuzz, M. D. Be, V. V. Rybkin, P. Seewald, F. Stein, T. Lain, R. Z. Khaliulli, O. Schüt, F. Schiffman, D. Golze, J. Wilhel, S. Chulko, M. H. Bani-Hashemian, V. Webe, U. Borštni, M. Taillefumie, A. S. Jakobovits, A. Lazzaro, H. Pabs, T. Mülle, R. Schad, M. Guido, S. Andermat, N. Holmber, G. K. Schente, A. Hehn, A. Bussy, F. Belleflamme, G. Tabacch, A. Glö, M. Las, I. Bethun, C. J. Mund, C. Pless,

M. Watkin, J. V. Vondel, M. Krac, J. Hutter, *J Chem Phys*, 2020, **152**, 19.

[4] J. P. Perdew, K. Burke and M. Ernzerhof, *Phys Rev Lett*, 1996, **77**, 3865.

## 5. NMR, Mass and IR Spectra of TFDNPA

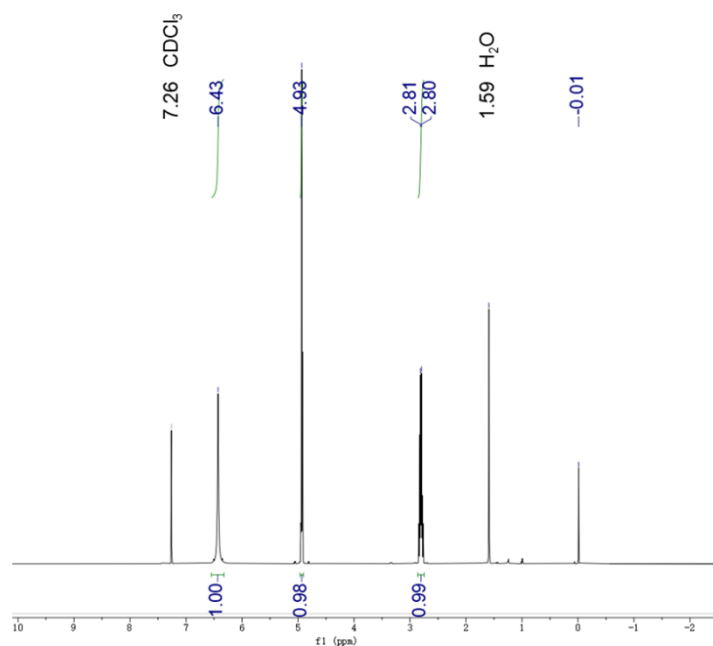

Figure S2  $^1\text{H}$  NMR spectrum of TFDNPA

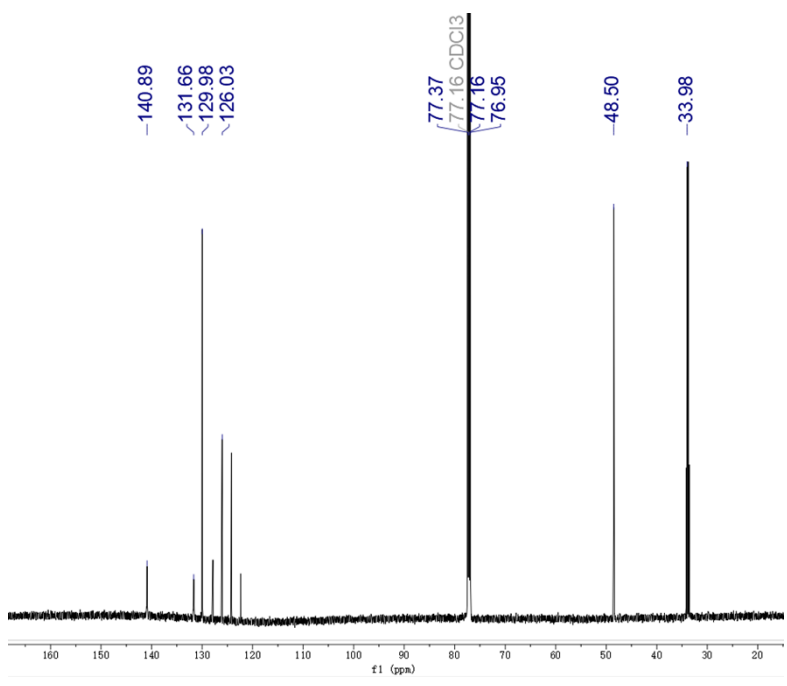

Figure S3 <sup>13</sup>C NMR spectrum of TFDNPA

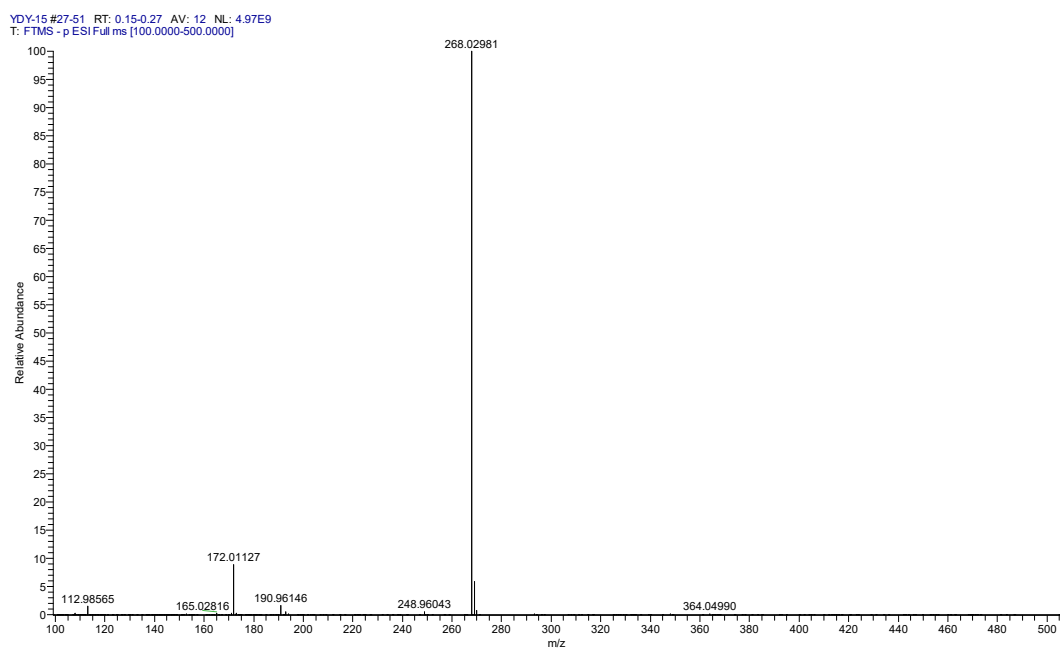

Figure S4 HRMS-Neg spectrum of TFDNPA

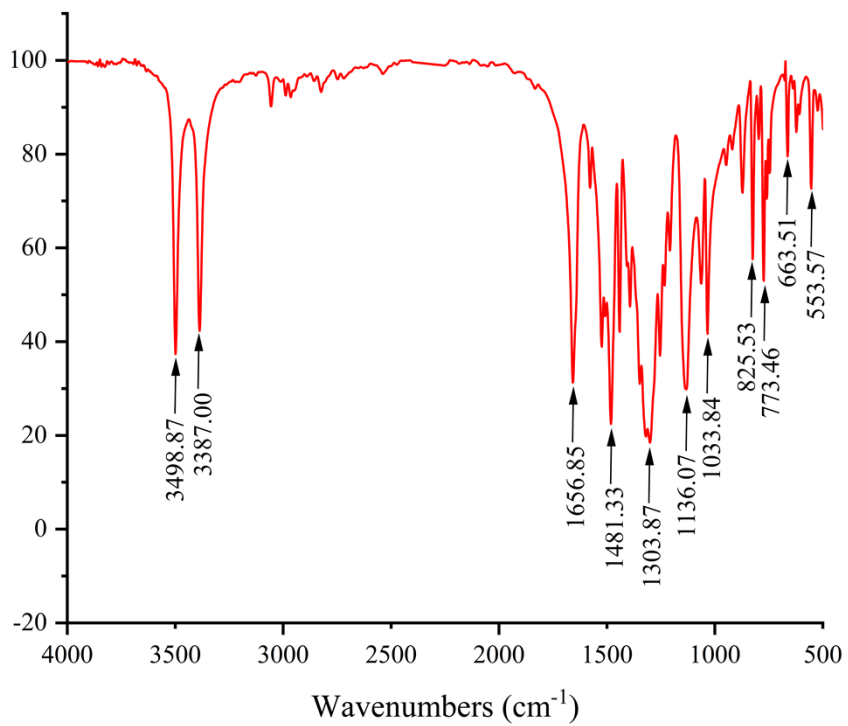

Figure S5 IR curve of compound **TFDNPA**
